# Supplementary material
Source: PubMed Central journal article supplement (PMC3492511)
Supplement: NIHMS386654-supplement-supplement_1.pdf [file NIHMS386654-supplement-supplement_1.pdf]

1 **Supplementary Table S1. Characteristics of the 24 SNPs included in the MCA assay of**  
 2 **393 cell lines.**

3

| SNP ID    | Chromosome | Position <sup>1</sup> | ObsHET | PredHET | HWpval   | %Geno | MAF  | Alleles |
|-----------|------------|-----------------------|--------|---------|----------|-------|------|---------|
| rs1040981 | chr6       | 31648763              | 0.34   | 0.44    | 0.6653   | 99    | 0.33 | A:T     |
| rs1042522 | chr17      | 7520197               | 0.23   | 0.43    | 1.26E-08 | 98.5  | 0.32 | A:T     |
| rs1143627 | chr2       | 113310858             | 0.40   | 0.46    | 2.60E-05 | 96.4  | 0.36 | A:T     |
| rs1554606 | chr7       | 22735232              | 0.34   | 0.45    | 1.81E-19 | 99.7  | 0.34 | A:T     |
| rs1799864 | chr3       | 46374212              | 0.18   | 0.23    | 2.04E-06 | 99.5  | 0.13 | T:A     |
| rs1800682 | chr10      | 90739943              | 0.39   | 0.50    | 0.0018   | 99    | 0.49 | T:A     |
| rs1800797 | chr7       | 22732746              | 0.31   | 0.41    | 0.0471   | 99.5  | 0.29 | A:T     |
| rs1800872 | chr1       | 205013030             | 0.32   | 0.43    | 0.0065   | 99    | 0.31 | A:T     |
| rs1800896 | chr1       | 205013520             | 0.34   | 0.49    | 3.02E-07 | 99.7  | 0.42 | T:A     |
| rs1801275 | chr16      | 27281901              | 0.25   | 0.34    | 1.58E-05 | 98.2  | 0.22 | T:A     |
| rs1805010 | chr16      | 27263704              | 0.45   | 0.50    | 3.00E-04 | 99    | 0.48 | T:A     |
| rs1805015 | chr16      | 27281681              | 0.21   | 0.25    | 7.94E-07 | 100   | 0.15 | A:T     |
| rs2234767 | chr10      | 90739236              | 0.21   | 0.30    | 1.11E-05 | 100   | 0.19 | A:T     |
| rs231775  | chr2       | 204440959             | 0.40   | 0.48    | 8.00E-04 | 98.7  | 0.39 | T:A     |
| rs3087243 | chr2       | 204447164             | 0.40   | 0.49    | 8.74E-05 | 99.5  | 0.41 | A:T     |
| rs352140  | chr3       | 52231737              | 0.40   | 0.50    | 2.23E-06 | 99    | 0.48 | T:A     |
| rs3761623 | chrX       | 12832023              | 0.11   | 0.49    | 1.81E-06 | 99.2  | 0.44 | T:A     |
| rs3775291 | chr4       | 187241068             | 0.32   | 0.41    | 7.35E-61 | 99.2  | 0.29 | A:T     |
| rs3788935 | chrX       | 12832580              | 0.09   | 0.45    | 7.02E-59 | 99.7  | 0.34 | T:A     |
| rs5743305 | chr4       | 187226327             | 0.34   | 0.45    | 2.94E-08 | 100   | 0.34 | A:T     |
| rs5743836 | chr3       | 52235822              | 0.16   | 0.20    | 6.00E-04 | 99.2  | 0.11 | A:T     |
| rs603965  | chr11      | 69172091              | 0.49   | 0.50    | 0.0062   | 98    | 0.47 | A:T     |
| rs7208422 | chr17      | 73642170              | 0.36   | 0.50    | 1.40E-05 | 96.9  | 0.49 | T:A     |
| rs8177374 | chr11      | 125668053             | 0.16   | 0.21    | 1.30E-07 | 98.7  | 0.12 | T:A     |

4

5 <sup>1</sup> Chromosome position based on the NCBI Build 36.3; ObsHet, marker's observed heterozygosity; PredHet,  
 6 marker's predicted heterozygosity; HWpval' Hardy-Weinberg equilibrium p value; %Geno, percentage of non-  
 7 missing genotypes for this marker; MAF is the minor allele frequency for the marker; Alleles, are the major and  
 8 minor alleles for this marker.

9

10

1 **Table S2. Median fluorescence intensities, calculated ratios and genotype attribution by MCA,**  
 2 **exemplarily shown for 12 SNP loci for 13 HEK293T subclones**

| HEK293T Subclone                           | SNP 1*                  |                         |       |          | SNP 2                   |                         |       |          | SNP 3                   |                         |       |          | SNP 4                   |                         |       |          | SNP 5                   |                         |       |          | SNP 6                   |                         |       |          |
|--------------------------------------------|-------------------------|-------------------------|-------|----------|-------------------------|-------------------------|-------|----------|-------------------------|-------------------------|-------|----------|-------------------------|-------------------------|-------|----------|-------------------------|-------------------------|-------|----------|-------------------------|-------------------------|-------|----------|
|                                            | A <sub>1</sub><br>(MFI) | A <sub>2</sub><br>(MFI) | Ratio | Genotype | A <sub>1</sub><br>(MFI) | A <sub>2</sub><br>(MFI) | Ratio | Genotype | A <sub>1</sub><br>(MFI) | A <sub>2</sub><br>(MFI) | Ratio | Genotype | A <sub>1</sub><br>(MFI) | A <sub>2</sub><br>(MFI) | Ratio | Genotype | A <sub>1</sub><br>(MFI) | A <sub>2</sub><br>(MFI) | Ratio | Genotype | A <sub>1</sub><br>(MFI) | A <sub>2</sub><br>(MFI) | Ratio | Genotype |
| 293T pMC-G-PMS2 10                         | 641                     | 5133                    | 0.12  | AA       | 5658                    | 981                     | 5.77  | TT       | 4739                    | 1413                    | 3.35  | TT       | 205                     | 1733                    | 0.15  | AA       | 4624                    | 471                     | 9.82  | TT       | 3171                    | 4817                    | 0.66  | AA       |
| 293T pMC-G-MLH1 3                          | 762                     | 4964                    | 0.15  | AA       | 5348                    | 943                     | 5.67  | TT       | 4430                    | 1383                    | 3.20  | TT       | 209                     | 1341                    | 0.16  | AA       | 4778                    | 541                     | 8.83  | TT       | 2847                    | 4403                    | 0.65  | AA       |
| 293T pMC-G-MLH1 2                          | 594                     | 4779                    | 0.12  | AA       | 5715                    | 960                     | 5.95  | TT       | 4619                    | 1533                    | 3.01  | TT       | 503                     | 2621                    | 0.19  | AA       | 4651                    | 439                     | 10.59 | TT       | 3019                    | 4816                    | 0.63  | AA       |
| 293T MutLa (mCherry-MLH1 GFP-PMS2)         | 631                     | 4445                    | 0.14  | AA       | 5504                    | 918                     | 6.00  | TT       | 4448                    | 1326                    | 3.36  | TT       | 578                     | 2770                    | 0.21  | AA       | 4228                    | 481                     | 8.79  | TT       | 3108                    | 4798                    | 0.65  | AA       |
| 293T MutLb 1 (mCherry-MLH1 GFP-PMS1)       | 491                     | 4844                    | 0.10  | AA       | 6030                    | 980                     | 6.15  | TT       | 4645                    | 1447                    | 3.21  | TT       | 614                     | 3384                    | 0.18  | AA       | 4553                    | 423                     | 10.76 | TT       | 3140                    | 5113                    | 0.61  | AA       |
| 293T MutSy 8 (YFP-His-MSH4 GFP-Strep-MSH5) | 574                     | 4303                    | 0.13  | AA       | 7039                    | 1218                    | 5.78  | TT       | 4847                    | 1511                    | 3.27  | TT       | 748                     | 3326                    | 0.22  | AA       | 4049                    | 414                     | 9.78  | TT       | 3305                    | 5174                    | 0.64  | AA       |
| 293T MutLa8 (mCherry-MLH1 GFP-PMS2)        | 619                     | 4784                    | 0.13  | AA       | 5552                    | 905                     | 6.14  | TT       | 4297                    | 1268                    | 3.39  | TT       | 637                     | 3235                    | 0.20  | AA       | 4281                    | 430                     | 9.97  | TT       | 3066                    | 4750                    | 0.65  | AA       |
| 293T MutLb 1 (mCherry-MLH1 GFP-PMS1)       | 577                     | 5276                    | 0.11  | AA       | 6454                    | 796                     | 8.11  | TT       | 4773                    | 1374                    | 3.47  | TT       | 533                     | 3002                    | 0.18  | AA       | 4715                    | 424                     | 11.12 | TT       | 3199                    | 5147                    | 0.62  | AA       |
| pMC-G-MLH3beta17 8                         | 760                     | 4534                    | 0.17  | AA       | 4952                    | 754                     | 6.57  | TT       | 4635                    | 1588                    | 2.89  | TT       | 320                     | 1877                    | 0.17  | AA       | 4339                    | 469                     | 9.25  | TT       | 2937                    | 4674                    | 0.63  | AA       |
| pMC-G-MLH3beta17 4                         | 658                     | 5223                    | 0.13  | AA       | 5435                    | 711                     | 7.65  | TT       | 4676                    | 1480                    | 3.16  | TT       | 304                     | 1876                    | 0.16  | AA       | 4581                    | 436                     | 10.51 | TT       | 2808                    | 4616                    | 0.61  | AA       |
| 293T MutLa 1 (mCherry-MLH1 GFP-PMS2)       | 724                     | 4769                    | 0.15  | AA       | 5745                    | 933                     | 6.16  | TT       | 4524                    | 1434                    | 3.16  | TT       | 387                     | 2158                    | 0.18  | AA       | 4428                    | 468                     | 9.46  | TT       | 2987                    | 4790                    | 0.62  | AA       |
| pMC-G-MLH3WT 8                             | 154                     | 4998                    | 0.11  | AA       | 6145                    | 956                     | 6.43  | TT       | 3348                    | 881                     | 3.80  | TT       | 565                     | 2938                    | 0.19  | AA       | 4580                    | 425                     | 10.78 | TT       | 2083                    | 3707                    | 0.56  | AA       |
| pMC-G-MLH3WT 12                            | 636                     | 4386                    | 0.15  | AA       | 6401                    | 1220                    | 5.25  | TT       | 4441                    | 1384                    | 3.21  | TT       | 653                     | 3067                    | 0.21  | AA       | 4143                    | 433                     | 9.57  | TT       | 3147                    | 5015                    | 0.63  | AA       |

  

| HEK293T Subclone                           | SNP 7                   |                         |       |          | SNP 8                   |                         |       |          | SNP 9                   |                         |       |          | SNP 10                  |                         |       |          | SNP 11                  |                         |       |          | SNP 12                  |                         |       |          |
|--------------------------------------------|-------------------------|-------------------------|-------|----------|-------------------------|-------------------------|-------|----------|-------------------------|-------------------------|-------|----------|-------------------------|-------------------------|-------|----------|-------------------------|-------------------------|-------|----------|-------------------------|-------------------------|-------|----------|
|                                            | A <sub>1</sub><br>(MFI) | A <sub>2</sub><br>(MFI) | Ratio | Genotype | A <sub>1</sub><br>(MFI) | A <sub>2</sub><br>(MFI) | Ratio | Genotype | A <sub>1</sub><br>(MFI) | A <sub>2</sub><br>(MFI) | Ratio | Genotype | A <sub>1</sub><br>(MFI) | A <sub>2</sub><br>(MFI) | Ratio | Genotype | A <sub>1</sub><br>(MFI) | A <sub>2</sub><br>(MFI) | Ratio | Genotype | A <sub>1</sub><br>(MFI) | A <sub>2</sub><br>(MFI) | Ratio | Genotype |
| 293T pMC-G-PMS2 10                         | 1438                    | 2189                    | 0.66  | AT       | 33                      | 1677                    | 0.02  | AA       | 165                     | 502                     | 3.59  | AT       | 1453                    | 107                     | 13.58 | TT       | 1215                    | 557                     | 2.18  | AA       | 3394                    | 1400                    | 2.57  | TT       |
| 293T pMC-G-MLH1 3                          | 1560                    | 2276                    | 0.69  | AT       | 42                      | 1806                    | 0.02  | AA       | 167                     | 573                     | 3.43  | AT       | 1595                    | 118                     | 13.52 | TT       | 1265                    | 608                     | 2.08  | AA       | 3387                    | 1546                    | 2.19  | TT       |
| 293T pMC-G-MLH1 2                          | 1347                    | 2734                    | 0.50  | AT       | 36                      | 1704                    | 0.02  | AA       | 177                     | 518                     | 2.93  | AT       | 1259                    | 88                      | 14.30 | TT       | 869                     | 421                     | 2.06  | AA       | 3277                    | 1395                    | 2.35  | TT       |
| 293T MutLa (mCherry-MLH1 GFP-PMS2)         | 1509                    | 2274                    | 0.66  | AT       | 53                      | 2236                    | 0.02  | AA       | 154                     | 526                     | 3.41  | AT       | 1351                    | 92                      | 14.68 | TT       | 971                     | 500                     | 1.94  | AA       | 3454                    | 1310                    | 2.64  | TT       |
| 293T MutLb 1 (mCherry-MLH1 GFP-PMS1)       | 1482                    | 2301                    | 0.64  | AT       | 37                      | 1768                    | 0.02  | AA       | 178                     | 579                     | 3.25  | AT       | 1138                    | 74                      | 15.48 | TT       | 793                     | 387                     | 2.05  | AA       | 3452                    | 1394                    | 2.48  | TT       |
| 293T MutSy 8 (YFP-His-MSH4 GFP-Strep-MSH5) | 1636                    | 2530                    | 0.65  | AT       | 36                      | 1582                    | 0.02  | AA       | 153                     | 530                     | 3.46  | AT       | 1319                    | 78                      | 16.91 | TT       | 840                     | 427                     | 1.97  | AA       | 3136                    | 1201                    | 2.61  | TT       |
| 293T MutLa8 (mCherry-MLH1 GFP-PMS2)        | 1394                    | 2056                    | 0.68  | AT       | 42                      | 1902                    | 0.02  | AA       | 174                     | 533                     | 3.07  | AT       | 1356                    | 85                      | 15.95 | TT       | 998                     | 557                     | 1.79  | AA       | 3053                    | 1103                    | 2.77  | TT       |
| 293T MutLb 1 (mCherry-MLH1 GFP-PMS1)       | 1595                    | 2526                    | 0.63  | AT       | 38                      | 1851                    | 0.02  | AA       | 193                     | 628                     | 3.26  | AT       | 1531                    | 93                      | 16.46 | TT       | 1035                    | 492                     | 2.10  | AA       | 3406                    | 1243                    | 2.74  | TT       |
| pMC-G-MLH3beta17 8                         | 1535                    | 2383                    | 0.64  | AT       | 38                      | 1782                    | 0.02  | AA       | 164                     | 496                     | 3.02  | AT       | 1603                    | 129                     | 12.42 | TT       | 1311                    | 682                     | 1.92  | AA       | 3076                    | 1326                    | 2.32  | TT       |
| pMC-G-MLH3beta17 4                         | 1676                    | 2507                    | 0.67  | AT       | 37                      | 1792                    | 0.02  | AA       | 150                     | 576                     | 3.03  | AT       | 2033                    | 152                     | 13.38 | TT       | 1623                    | 826                     | 1.96  | AA       | 3804                    | 1483                    | 2.57  | TT       |
| 293T MutLa 1 (mCherry-MLH1 GFP-PMS2)       | 1478                    | 2259                    | 0.65  | AT       | 46                      | 1901                    | 0.02  | AA       | 155                     | 485                     | 3.13  | AT       | 1399                    | 112                     | 12.49 | TT       | 1057                    | 504                     | 2.10  | AA       | 3391                    | 1381                    | 2.46  | TT       |
| pMC-G-MLH3WT 8                             | 1037                    | 1917                    | 0.54  | AT       | 37                      | 1838                    | 0.02  | AA       | 179                     | 582                     | 3.25  | AT       | 1624                    | 110                     | 14.76 | TT       | 2280                    | 1286                    | 1.77  | AA       | 3217                    | 1251                    | 2.57  | TT       |
| pMC-G-MLH3WT 12                            | 1423                    | 2209                    | 0.64  | AT       | 39                      | 1653                    | 0.02  | AA       | 167                     | 502                     | 3.01  | AT       | 1257                    | 90                      | 13.97 | TT       | 919                     | 436                     | 2.11  | AA       | 3095                    | 1195                    | 2.59  | TT       |

4

5

6 <sup>a</sup> SNP locus 1, indicated are median fluorescence intensities (MFI) of the alleles 1 and 2, the ratio of

7 both alleles and the corresponding genotype

8
